# Supplementary material for: Improving the Yields and Reaction Rate in the Ethanolysis of Soybean Oil by Using Mixtures of Lipase CLEAs
Source: MDPI journal article supplement (doi:10.3390/molecules24234392), 2019-12-01
Supplement: s1 [file s1]

## Supplementary Materials

**Table S1.** Reaction mixture content in the transesterification assays shown in Figure 2.

|                   | U/g oil | Mass of CLEA (mg) | Total activity (U) | Oil (g) | Ethanol (g) |
|-------------------|---------|-------------------|--------------------|---------|-------------|
| Mixture of CLEAs: |         |                   |                    |         |             |
| TLL-SDS-CLEA      | 6000    | 25.02             | 6000               | 1.0     | 0.2812      |
| PPL-SOY-CLEA      |         | 88.36             |                    |         |             |
| PPL-SOY-CLEA      | 6000    | 176.72            | 6000               | 1.0     | 0.2812      |
|                   | 3000    | 88.36             | 3000               | 1.0     | 0.2812      |
| TLL-SOY-CLEA      | 6000    | 50.05             | 6000               | 1.0     | 0.2812      |
|                   | 3000    | 25.02             | 3000               | 1.0     | 0.2812      |

Hydrolytic activities in U/mg dry CLEA: 119.89 (TLL-SDS-CLEA) and 33.95 (PPL-SOY-CLEA). All assays were carried using an oil/ethanol molar ratio of 1:5.

**Table S2.** Reaction mixture content in the transesterification assays shown in Figure 3a.

| Oil/ethanol molar ratio | Mass of CLEA (mg) |              |                    | Mass in g |         |
|-------------------------|-------------------|--------------|--------------------|-----------|---------|
|                         | PPL-SOY-CLEA      | TLL-SDS-CLEA | Total activity (U) | Oil       | Ethanol |
| 1:3                     | 37.42             | 15.94        | 2,500              | 5.0       | 0.7915  |
| 1:5                     | 37.42             | 15.94        | 2,500              | 5.0       | 1.3192  |
| 1:7                     | 37.42             | 15.94        | 2,500              | 5.0       | 1.8469  |
| 1:10                    | 37.42             | 15.94        | 2,500              | 5.0       | 2.6385  |

Hydrolytic activities in U/mg dry CLEA: 78.4 (TLL-SDS-CLEA) and 33.4 (PPL-SOY-CLEA). All assays were carried out using 500 U/g oil.

**Table S3.** Reaction mixture content in the transesterification assays shown in Figure 3b.

| Oil/ethanol molar ratio | Mass of CLEA (mg) |              |                    | Mass in g |         |
|-------------------------|-------------------|--------------|--------------------|-----------|---------|
|                         | PPL-SOY-CLEA      | TLL-SDS-CLEA | Total activity (U) | Oil       | Ethanol |
| 1:3                     | 89.82             | 38.27        | 6000               | 1.0       | 0.1583  |
| 1:5                     | 89.82             | 38.27        | 6000               | 1.0       | 0.2638  |

Hydrolytic activities in U/mg dry CLEA: 78.4 (TLL-SDS-CLEA) and 33.4 (PPL-SOY-CLEA). All assays were carried out using 6000 U/g oil.

**Table S4.** Reaction mixture content in the transesterification assays shown in Figures 4 (time profile in the VFR) and 5 (reuse assays in the VFR).

| Mass of PPL-SOY-CLEA (mg) | Mass of TLL-SDS-CLEA (mg) | Total activity (U) | Mass of soybean oil (g) | Mass of ethanol (g) |
|---------------------------|---------------------------|--------------------|-------------------------|---------------------|
| 779.22                    | 382.65                    | 60,000             | 10.0                    | 1.5831              |

Hydrolytic activities in U/mg dry CLEA: 78.4 (TLL-SDS-CLEA) and 38.5 (PPL-SOY-CLEA). All assays were carried out using 6000 U/g oil, an oil/ethanol molar ratio of 1:3 and for 6 h reaction.

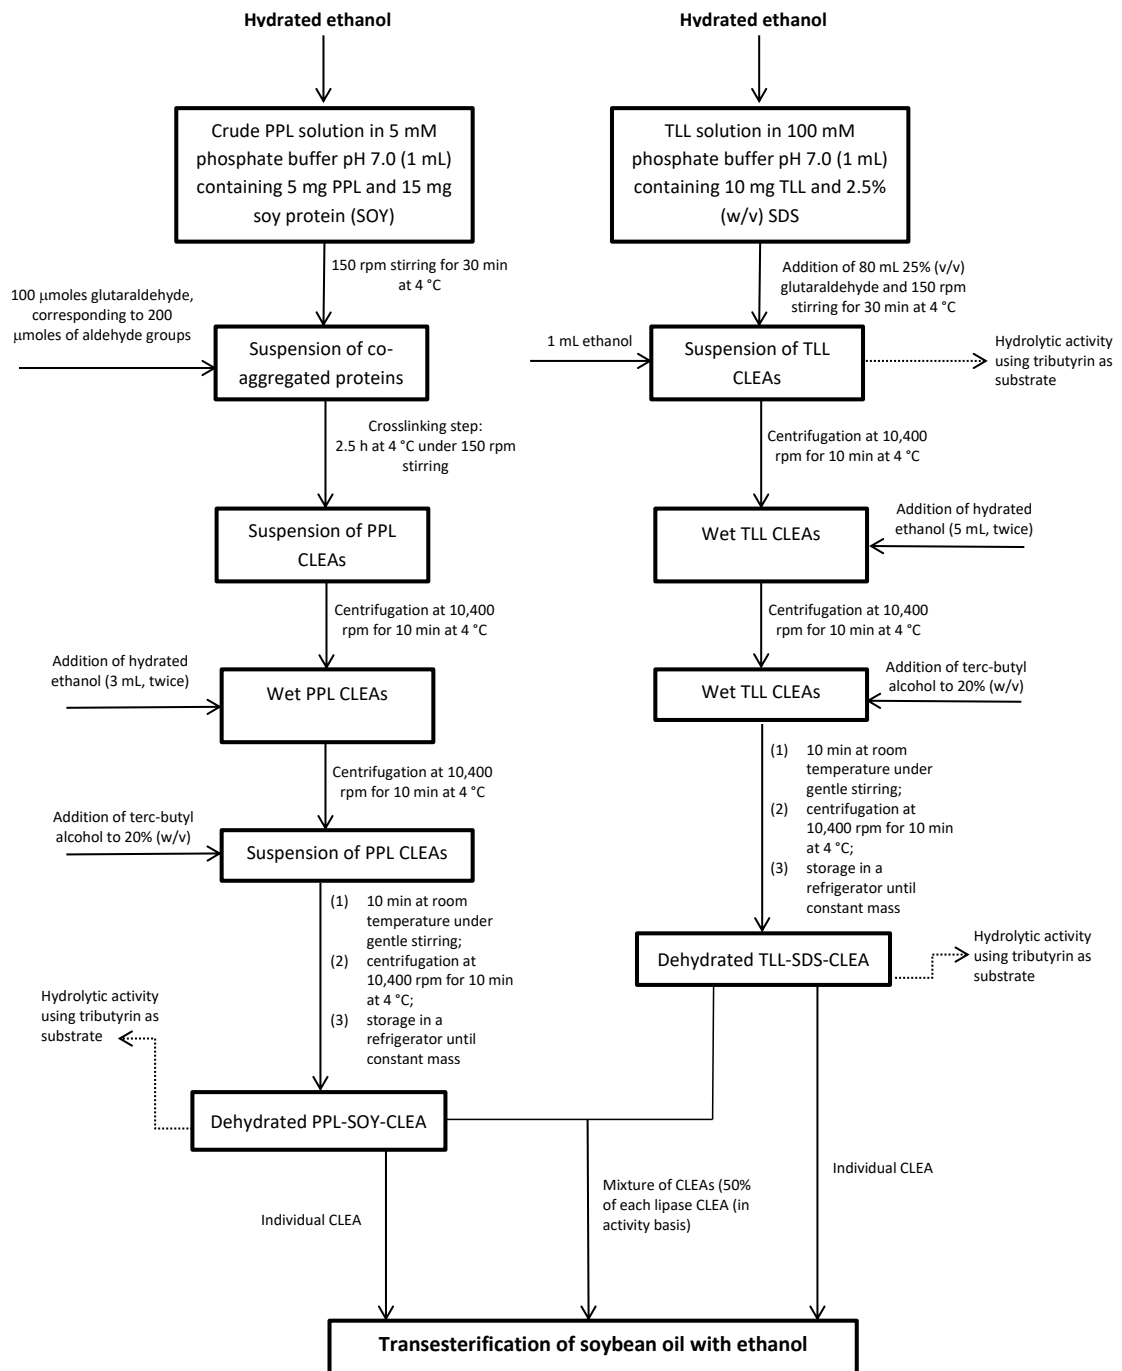

**Figure S1.** Scheme of preparation of CLEAs of porcine pancreas lipase (PPL) and *Thermomyces lanuginosus* lipase (TLL) for transesterification of soybean oil with ethanol.
